# Supplementary material for: Cost-effectiveness of Simvastatin plus Ezetimibe for Cardiovascular Prevention in CKD: Results of the Study of Heart and Renal Protection (SHARP)
Source: PubMed Central journal article supplement (PMC4801501; doi:10.1053/j.ajkd.2015.09.020), 2016-04
Supplement: mmc1.pdf [file mmc1.pdf]

**Table S1: Cox proportional hazards model predicting the risk of a first significant cardiovascular event (ie, nonfatal myocardial infarction, nonfatal stroke, any revascularization procedure, or vascular death) in SHARP participants**

| <b>Patient characteristic (at randomization)</b>                      | <b>Parameter category</b>                           | <b>Hazard ratio<sup>1</sup><br/>(95% CI)</b> |
|-----------------------------------------------------------------------|-----------------------------------------------------|----------------------------------------------|
| Gender (Reference: Female)                                            | Male                                                | 1.4 (1.2, 1.6)                               |
| Ethnicity (Reference: White)                                          | Asian: from China                                   | 1.3 (1.0, 1.7)                               |
|                                                                       | Asian: other                                        | 0.7 (0.6, 0.9)                               |
|                                                                       | Black                                               | 1.0 (0.7, 1.3)                               |
|                                                                       | Other ethnicity                                     | 0.8 (0.6, 1.1)                               |
|                                                                       | Smoker (Reference: Never smoker)                    | Previous smoker                              |
|                                                                       | Current smoker                                      | 1.4 (1.2, 1.7)                               |
| Diabetes                                                              | Yes                                                 | 1.4 (1.2, 1.7)                               |
| Systolic blood pressure, mmHg<br>(Reference: $\geq 130$ , $< 150$ )   | $< 130$                                             | 1.1 (0.9, 1.2)                               |
|                                                                       | $\geq 150$                                          | 1.3 (1.2, 1.5)                               |
|                                                                       | Albumin, g/dL<br>(Reference: $\geq 3.9$ , $< 4.2$ ) | $< 3.8$                                      |
|                                                                       | $\geq 4.2$                                          | 0.9 (0.7, 1.0)                               |
|                                                                       | Missing                                             | 1.1 (0.9, 1.4)                               |
| Hemoglobin, g/dL<br>(Reference: $\geq 11.6$ , $< 13$ )                | $< 11.6$                                            | 1.2 (1.1, 1.4)                               |
|                                                                       | $\geq 13$                                           | 0.9 (0.8, 1.1)                               |
|                                                                       | Missing                                             | 1.1 (0.9, 1.4)                               |
| Total cholesterol, mmol/L<br>(Reference: $\geq 4.3$ , $< 5.3$ )       | $< 4.3$                                             | 1.0 (0.9, 1.1)                               |
|                                                                       | $\geq 5.3$                                          | 1.2 (1.1, 1.4)                               |
| HDL-cholesterol, mmol/L<br>(Reference: $\geq 0.9$ , $< 1.2$ )         | $< 0.9$                                             | 1.2 (1.1, 1.3)                               |
|                                                                       | $\geq 1.2$                                          | 1.0 (0.9, 1.1)                               |
| Urinary ACR (pre-RRT participants only), mg/g<br>(Reference: $< 30$ ) | $\geq 30$ , $\leq 300$                              | 1.2 (1.0, 1.5)                               |
|                                                                       | $> 300$                                             | 1.4 (1.1, 1.8)                               |
|                                                                       | Missing                                             | 1.2 (0.9, 1.6)                               |
| Type of renal disease (Reference: Other known / unknown cause)        | Diabetic nephropathy                                | 1.4 (1.2, 1.8)                               |
|                                                                       | Cystic kidney disease                               | 0.9 (0.7, 1.1)                               |

| <b>Patient characteristic (at randomization)</b>              | <b>Parameter category</b> | <b>Hazard ratio<sup>1</sup><br/>(95% CI)</b> |
|---------------------------------------------------------------|---------------------------|----------------------------------------------|
| Age                                                           | per 10 years              | 1.5 (1.4, 1.6)                               |
| CKD stage at randomization (Reference: stage 3 <sup>2</sup> ) | CKD stage 4               | 1.2 (1.1, 1.5)                               |
|                                                               | CKD stage 5               | 1.7 (1.4, 2.0)                               |
|                                                               | On dialysis, duration <3  | 2.7 (2.2, 3.5)                               |
|                                                               | On dialysis, duration >3  | 3.4 (2.6, 4.3)                               |
| History of vascular disease                                   | Yes                       | 1.9 (1.7, 2.1)                               |

CKD, Chronic Kidney Disease;

<sup>1</sup>The event hazard over time was further adjusted for ezetimibe/simvastatin allocation weighted for net use of lipid lowering intervention between treatment allocation arms (a time-updated covariate in the Cox model) defined as 'net use of LDL-lowering treatment' annually during the study as the difference in the proportions of ezetimibe/simvastatin and placebo-allocated patients taking any LDL-lowering treatment (at least 80% of study ezetimibe/simvastatin or use of non-study statin). The treatment-allocation was not used in prediction of cardiovascular disease risk for the purpose of stratification into cardiovascular risk categories.

<sup>2</sup>83% of participants in this category with CKD stage 3b (eGFR  $\geq 30$  to  $<45$  ml/min/1.73m<sup>2</sup>).
