# Supplementary material for: Cost-effectiveness of Simvastatin plus Ezetimibe for Cardiovascular Prevention in CKD: Results of the Study of Heart and Renal Protection (SHARP)
Source: PubMed Central journal article supplement (PMC4801501; doi:10.1053/j.ajkd.2015.09.020), 2016-04
Supplement: mmc2.pdf [file mmc2.pdf]

**Table S2: Reductions in LDL-cholesterol and UK costs of different high-intensity statin-based regimens**

| Dose (mg/day)                                                                                   | Reduction in LDL-cholesterol (%) |       |       |       |
|-------------------------------------------------------------------------------------------------|----------------------------------|-------|-------|-------|
|                                                                                                 | 10                               | 20    | 40    | 80    |
| Simvastatin <sup>1</sup>                                                                        |                                  |       |       | 42%   |
| Atorvastatin <sup>2</sup>                                                                       |                                  | 44%   | 48%   | 53%   |
| Rosuvastatin <sup>1</sup>                                                                       | 43%                              | 48%   | 53%   |       |
| Simvastatin 20mg plus ezetimibe 10mg <sup>2</sup>                                               |                                  | 51%   |       |       |
|                                                                                                 | Daily cost (£) <sup>3</sup>      |       |       |       |
| Simvastatin                                                                                     |                                  |       |       | £0.07 |
| Atorvastatin                                                                                    |                                  | £0.05 | £0.06 | £0.10 |
| Rosuvastatin                                                                                    | £0.64                            | £0.93 | £1.06 |       |
| Simvastatin 20mg plus ezetimibe 10mg                                                            |                                  | £1.19 |       |       |
| LDL-cholesterol reduction potency compared to simvastatin 20mg plus ezetimibe 10mg <sup>4</sup> |                                  |       |       |       |
| Simvastatin                                                                                     |                                  |       |       | 82%   |
| Atorvastatin                                                                                    |                                  | 86%   | 94%   | 104%  |
| Rosuvastatin                                                                                    | 84%                              | 94%   | 104%  |       |

Note: High-intensity statin as those achieving 40% or more reductions in LDL-cholesterol.

1. National Institute for Health and Care Excellence. Lipid modification: cardiovascular risk assessment and the modification of blood lipids for the primary and secondary prevention of cardiovascular disease. National Institute for Health and Care Excellence; 2014.

2. Ballantyne CM, Abate N, Yuan Z, King TR, Palmisano J. Dose-comparison study of the combination of ezetimibe and simvastatin (Vytorin) versus atorvastatin in patients with hypercholesterolemia: the Vytorin Versus Atorvastatin (VYVA) study. *Am Heart J*. 2005 Mar;149(3):464-73.

3. NHS Prescription Services. NHS Electronic Drug Tariff March 2015. Available from:  
[http://www.ppa.org.uk/edt/March\\_2015/mindex.htm](http://www.ppa.org.uk/edt/March_2015/mindex.htm).

4. Ratio of proportional reductions in LDL-cholesterol compared to simvastatin 20mg plus ezetimibe 10mg (e.g., 0.86 for atorvastatin 20mg daily calculated as the ratio of 44% and 51%)
