# Supplementary material for: Cost-effectiveness of Simvastatin plus Ezetimibe for Cardiovascular Prevention in CKD: Results of the Study of Heart and Renal Protection (SHARP)
Source: PubMed Central journal article supplement (PMC4801501; doi:10.1053/j.ajkd.2015.09.020), 2016-04
Supplement: mmc3.pdf [file mmc3.pdf]

**Table S3: LDL-cholesterol differences at 2.5 years with use of simvastatin plus ezetimibe in SHARP**

|                                              | <b>Differences between ezetimibe/simvastatin- and placebo-allocated participants</b> |                                  | <b>Estimated LDL-C difference (mmol/L) between ezetimibe/simvastatin- and placebo-allocated participants with full adherence to ezetimibe/simvastatin</b> |
|----------------------------------------------|--------------------------------------------------------------------------------------|----------------------------------|-----------------------------------------------------------------------------------------------------------------------------------------------------------|
|                                              | <b>Net use of any LDL-C lowering treatment</b>                                       | <b>LDL-C difference (mmol/L)</b> |                                                                                                                                                           |
| <b>5-year risk of cardiovascular disease</b> |                                                                                      |                                  |                                                                                                                                                           |
| <10%                                         | 66%                                                                                  | 0.95                             | 1.44                                                                                                                                                      |
| 10% - 20%                                    | 61%                                                                                  | 0.87                             | 1.43                                                                                                                                                      |
| ≥20%                                         | 58%                                                                                  | 0.74                             | 1.28                                                                                                                                                      |
| <b>CKD stage at randomization</b>            |                                                                                      |                                  |                                                                                                                                                           |
| 3 <sup>1</sup>                               | 66%                                                                                  | 0.98                             | 1.48                                                                                                                                                      |
| 4                                            | 68%                                                                                  | 1.05                             | 1.54                                                                                                                                                      |
| 5, not on dialysis                           | 56%                                                                                  | 0.72                             | 1.29                                                                                                                                                      |
| On dialysis                                  | 54%                                                                                  | 0.60                             | 1.11                                                                                                                                                      |
| <b>All patients</b>                          | <b>61%</b>                                                                           | <b>0.85</b>                      | <b>1.39</b>                                                                                                                                               |

LDL-C, LDL-cholesterol; CVD, cardiovascular disease; CKD, chronic kidney disease.

<sup>1</sup>83% of participants in this category with CKD stage 3b (eGFR ≥30 to <45 ml/min/1.73m<sup>2</sup>)
