# Supplementary material for: Cost-effectiveness of Simvastatin plus Ezetimibe for Cardiovascular Prevention in CKD: Results of the Study of Heart and Renal Protection (SHARP)
Source: PubMed Central journal article supplement (PMC4801501; doi:10.1053/j.ajkd.2015.09.020), 2016-04
Supplement: mmc4.pdf [file mmc4.pdf]

**Table S4: Mean (SD) hospital episodes per participant and effect of allocation to simvastatin plus ezetimibe in SHARP**

| Hospital episode category        | Number of hospital episodes during SHARP |         | Hospital episodes per participant allocated to: |             | Rate ratio (95% CI) |
|----------------------------------|------------------------------------------|---------|-------------------------------------------------|-------------|---------------------|
|                                  | Ezetimibe/simvastatin                    | Placebo | Ezetimibe/simvastatin                           | Placebo     |                     |
|                                  | n=4650                                   | n=4620  | n=4650                                          | n=4620      |                     |
| Any atherosclerotic              | 873                                      | 1,029   | 0.19 (0.62)                                     | 0.22 (0.66) | 0.84 (0.74, 0.96)   |
| Any non-atherosclerotic vascular | 953                                      | 1,070   | 0.20 (0.58)                                     | 0.23 (0.62) | 0.89 (0.79, 0.99)   |
| Renal                            | 5,471                                    | 5,645   | 1.18 (1.95)                                     | 1.22 (1.93) | 0.97 (0.90, 1.03)   |
| Other                            | 5,932                                    | 5,748   | 1.28 (1.88)                                     | 1.24 (1.77) | 1.03 (0.97, 1.09)   |
