# Supplementary material for: Cost-effectiveness of Simvastatin plus Ezetimibe for Cardiovascular Prevention in CKD: Results of the Study of Heart and Renal Protection (SHARP)
Source: PubMed Central journal article supplement (PMC4801501; doi:10.1053/j.ajkd.2015.09.020), 2016-04
Supplement: mmc5.pdf [file mmc5.pdf]

**Table S5: Number of vascular hospital episodes (ie, including any vascular event) in SHARP by case-mix group or specialty and cost per episode**

| <b>A. Inpatient and day case admissions</b> |                                                                                                           |                           |                                         |
|---------------------------------------------|-----------------------------------------------------------------------------------------------------------|---------------------------|-----------------------------------------|
| <b>HRG</b>                                  | <b>Description</b>                                                                                        | <b>Number of episodes</b> | <b>Cost (£) per episode<sup>1</sup></b> |
| AA05B                                       | Intracranial Procedures Except Trauma with Haemorrhagic Cerebrovascular Disorders - category 4 without CC | 1                         | 4,295                                   |
| AA11B                                       | Intracranial Procedures Except Trauma with Haemorrhagic Cerebrovascular Disorders - category 3 without CC | 2                         | 9,803                                   |
| AA22A                                       | Non-Transient Stroke or Cerebrovascular Accident, Nervous system infections or Encephalopathy with CC     | 218                       | 2,568                                   |
| AA23A                                       | Haemorrhagic Cerebrovascular Disorders with CC                                                            | 44                        | 2,636                                   |
| AA24A                                       | Brain Tumours or Cerebral Cysts with CC                                                                   | 2                         | 2,332                                   |
| AA25A                                       | Cerebral Degenerations or Miscellaneous Disorders of Nervous System with CC                               | 4                         | 1,727                                   |
| AA26A                                       | Muscular, Balance, Cranial or Peripheral Nerve disorders; Epilepsy; Head Injury with CC                   | 2                         | 1,197                                   |
| AA28A                                       | Motor Neuron Disease with CC                                                                              | 1                         | 2,787                                   |
| AA29A                                       | Transient Ischaemic Attack with CC                                                                        | 61                        | 909                                     |
| BZ23Z                                       | Vitreous Retinal Procedures - category 1                                                                  | 1                         | 468                                     |
| BZ24A                                       | Non-Surgical Ophthalmology with length of stay 2 days or more                                             | 6                         | 2,326                                   |
| DZ09A                                       | Pulmonary Embolus with Major CC                                                                           | 25                        | 1,896                                   |
| DZ09B                                       | Pulmonary Embolus with CC                                                                                 | 20                        | 1,372                                   |
| DZ09C                                       | Pulmonary Embolus without CC                                                                              | 1                         | 932                                     |
| DZ16A                                       | Pleural Effusion with Major CC                                                                            | 4                         | 2,123                                   |
| DZ17B                                       | Respiratory Neoplasms with CC                                                                             | 1                         | 1,634                                   |
| DZ19A                                       | Other Respiratory Diagnoses with Major CC                                                                 | 4                         | 903                                     |
| DZ21H                                       | Chronic Obstructive Pulmonary Disease or Bronchitis without NIV without Intubation with Major CC          | 10                        | 1,959                                   |

|       |                                                                                            |     |        |
|-------|--------------------------------------------------------------------------------------------|-----|--------|
| DZ23A | Bronchopneumonia with Major CC                                                             | 11  | 2,137  |
| DZ23B | Bronchopneumonia with CC                                                                   | 2   | 1,630  |
| DZ24A | Inhalation Lung Injury or Foreign Body with Major CC                                       | 5   | 2,667  |
| DZ26A | Pneumothorax with CC                                                                       | 1   | 1,633  |
| DZ27D | Respiratory Failure without Intubation with Major CC                                       | 2   | 1,987  |
| DZ29A | Granulomatous, Allergic Alveolitis or Autoimmune Lung Disease with CC                      | 50  | 1,602  |
| DZ29B | Granulomatous, Allergic Alveolitis or Autoimmune Lung Disease without CC                   | 1   | 809    |
| DZ51Z | Complex Tuberculosis                                                                       | 2   | 17,869 |
| EA03Z | Pace 1 - Single chamber or Implantable Diagnostic Device                                   | 81  | 2,697  |
| EA12Z | Implantation of Cardioverter - Defibrillator only                                          | 14  | 12,621 |
| EA14Z | Coronary Artery Bypass Graft (First Time)                                                  | 107 | 9,083  |
| EA17Z | Single Cardiac Valve Procedures                                                            | 63  | 10,851 |
| EA19Z | Single Cardiac Valve Procedures with Percutaneous Coronary Intervention, Pacing, EP or RFA | 1   | 12,338 |
| EA26Z | Standard Congenital Surgery                                                                | 4   | 4,638  |
| EA27Z | Percutaneous Standard EP or Ablation                                                       | 6   | 3,544  |
| EA31Z | Percutaneous Coronary Intervention (0-2 Stents)                                            | 253 | 2,579  |
| EA36A | Catheter 19 years and over                                                                 | 371 | 1,555  |
| EA44Z | Minor Cardiac Procedures                                                                   | 7   | 2,529  |
| EA51Z | Coronary Artery Bypass Graft with valve replacement or repair                              | 18  | 11,283 |
| EA52Z | Repair or replacement of more than one heart valve                                         | 1   | 12,765 |
| EB01Z | Non interventional acquired cardiac conditions                                             | 380 | 721    |
| EB02Z | Endocarditis                                                                               | 3   | 3,890  |
| EB03H | Heart Failure or Shock with CC                                                             | 9   | 2,309  |
| EB03I | Heart Failure or Shock without CC                                                          | 242 | 1,397  |
| EB05Z | Cardiac Arrest                                                                             | 3   | 1,233  |
| EB07H | Arrhythmia or Conduction Disorders with CC                                                 | 12  | 1,472  |
| EB07I | Arrhythmia or Conduction Disorders without CC                                              | 381 | 768    |

|       |                                                                                              |     |       |
|-------|----------------------------------------------------------------------------------------------|-----|-------|
| EB08H | Syncope or Collapse with CC                                                                  | 4   | 1,146 |
| EB08I | Syncope or Collapse without CC                                                               | 32  | 661   |
| EB10Z | Actual or Suspected Myocardial Infarction                                                    | 187 | 1,410 |
| FZ02Z | Very Major Oesophageal Procedures                                                            | 1   | 2,959 |
| FZ05A | Major Stomach or Duodenum Procedures 2 years and over with CC                                | 1   | 4,577 |
| FZ10A | Distal colon procedures with Major CC                                                        | 3   | 8,350 |
| FZ10B | Distal colon procedures without Major CC                                                     | 2   | 5,904 |
| FZ11A | Large Intestine - Major Procedures with Major CC                                             | 12  | 6,764 |
| FZ16Z | Very Major Procedures for Gastrointestinal Bleed                                             | 1   | 4,831 |
| FZ17A | Abdominal Hernia Procedures 19 years and over with Major CC                                  | 1   | 4,531 |
| FZ18A | Inguinal Umbilical or Femoral Hernia Repairs 19 years and over with Major CC                 | 3   | 2,668 |
| FZ18C | Inguinal Umbilical or Femoral Hernia Repairs 19 years and over without CC                    | 1   | 1,506 |
| FZ24A | Major Therapeutic Open or Endoscopic Procedures 19 years and over with Major CC              | 1   | 1,965 |
| FZ31D | Disorders of the Oesophagus with length of stay 2 days or more with Major CC                 | 1   | 2,961 |
| FZ31E | Disorders of the Oesophagus with length of stay 2 days or more without Major CC              | 1   | 1,986 |
| FZ36D | Intestinal Infectious Disorders with length of stay 2 days or more Major CC                  | 3   | 3,597 |
| FZ36E | Intestinal Infectious Disorders with length of stay 2 days or more without Major CC          | 1   | 1,897 |
| FZ38D | Gastrointestinal Bleed with length of stay 2 days or more with Major CC                      | 3   | 2,236 |
| FZ38E | Gastrointestinal Bleed with length of stay 2 days or more without Major CC                   | 1   | 1,398 |
| FZ43A | Non-Malignant Stomach or Duodenum Disorders with length of stay 2 days or more with Major CC | 5   | 2,417 |
| FZ44A | Malignant Stomach or Duodenum Disorders with length of stay 2 days or more with Major CC     | 1   | 3,041 |
| FZ44B | Malignant Stomach or Duodenum Disorders with length of stay 2 days or more without Major CC  | 1   | 2,371 |

|       |                                                                                               |   |        |
|-------|-----------------------------------------------------------------------------------------------|---|--------|
| FZ45A | Non-Malignant Large Intestinal Disorders with length of stay 2 days or more with Major CC     | 2 | 2,842  |
| FZ45B | Non-Malignant Large Intestinal Disorders with length of stay 2 days or more without Major CC  | 3 | 1,878  |
| FZ46A | Malignant Large Intestinal Disorders with length of stay 2 days or more with Major CC         | 1 | 3,852  |
| FZ47A | Non-Malignant General Abdominal Disorders with length of stay 2 days or more with Major CC    | 9 | 2,863  |
| FZ47B | Non-Malignant General Abdominal Disorders with length of stay 2 days or more without Major CC | 1 | 1,628  |
| FZ60Z | Diagnostic Endoscopic Procedures on the Upper GI Tract 19 years and over                      | 1 | 454    |
| FZ66A | Very Major Small Intestine Procedures 19 years and over with CC                               | 1 | 7,441  |
| GA01C | Hepatobiliary Transplant 18 years and over                                                    | 1 | 19,620 |
| GA10F | Open or Laparoscopic Cholecystectomy with CC                                                  | 2 | 3,037  |
| GC15D | Non-Malignant Liver Disorders without Major CCs                                               | 3 | 1,419  |
| GC16C | Non-Malignant Pancreatic and Biliary Disorders with Major CCs                                 | 6 | 1,769  |
| GC16D | Non-Malignant Pancreatic and Biliary Disorders without Major CCs                              | 2 | 1,272  |
| HA11C | Major Hip Procedures Category 2 for Trauma without CC                                         | 1 | 8,142  |
| HA91Z | Hip Trauma Diagnosis without Procedure                                                        | 2 | 2,881  |
| HA92Z | Knee Trauma Diagnosis without Procedure                                                       | 3 | 2,514  |
| HA97Z | Other Trauma Diagnosis without Procedure                                                      | 1 | 1,382  |
| HA99Z | Other Procedures for Trauma                                                                   | 4 | 4,560  |
| HB11A | Major Hip Procedures for non Trauma Category 2 with Major CC                                  | 1 | 12,106 |
| HB11C | Major Hip Procedures for non Trauma Category 2 without CC                                     | 2 | 6,418  |
| HB21A | Major Knee Procedures for non Trauma Category 2 with Major CC                                 | 1 | 8,764  |
| HB21C | Major Knee Procedures for non Trauma Category 2 without CC                                    | 2 | 5,963  |

|       |                                                                               |    |       |
|-------|-------------------------------------------------------------------------------|----|-------|
| HB32A | Intermediate Foot Procedures for non -Trauma Category 2 19 years and over     | 5  | 2,538 |
| HB34D | Minor Foot Procedures for Non -Trauma Category 2 19 years and over with CC    | 42 | 3,506 |
| HB34E | Minor Foot Procedures for Non -Trauma Category 2 19 years and over without CC | 5  | 1,469 |
| HB54C | Intermediate Hand Procedures for non Trauma Category 1 without CC             | 3  | 1,498 |
| HB99Z | Other Procedures for non Trauma                                               | 1  | 2,146 |
| HC03B | Extradural Spine Intermediate 2 with CC                                       | 2  | 8,513 |
| HC20C | Vertebral Column Injury without Procedure without CC                          | 1  | 2,088 |
| HC21C | Spinal Cord Injury without Procedure without CC                               | 1  | 5,615 |
| HC27B | Degenerative Spinal Conditions with CC                                        | 1  | 1,500 |
| HD23A | Inflammatory Spine, Joint or Connective Tissue Disorders with Major CC        | 2  | 2,266 |
| HD23B | Inflammatory Spine, Joint or Connective Tissue Disorders with CC              | 8  | 836   |
| HD25A | Infections of Bones or Joints with Major CC                                   | 3  | 3,832 |
| HD25B | Infections of Bones or Joints with CC                                         | 2  | 2,194 |
| HR05Z | Reconstruction Procedures Category 2                                          | 2  | 7,171 |
| JC03A | Major Skin Procedures category 1 with Major CC                                | 1  | 6,105 |
| JD01B | Major Skin disorders category 2 with Intermediate CC                          | 1  | 1,842 |
| JD02B | Major Skin disorders category 1 with Intermediate CC                          | 1  | 1,929 |
| JD04A | Intermediate Skin disorders category 1 with Major CC                          | 1  | 2,109 |
| JD05A | Minor Skin disorders category 2 with Major CC                                 | 1  | 1,368 |
| KA03A | Parathyroid Procedures with CC                                                | 5  | 2,710 |
| KA06A | Non Pituitary Neoplasia and Hypoplasia with CC                                | 1  | 1,968 |
| KA07Z | Non-Surgical Thyroid Disorders                                                | 1  | 1,074 |
| KA08Z | Other Endocrine Disorders                                                     | 1  | 1,003 |
| KA09A | Thyroid Procedures with CC                                                    | 1  | 3,488 |
| KB02B | Diabetes with Hyperglycaemic Disorders 70 years and over with Intermediate CC | 1  | 1,214 |

|       |                                                                                            |    |        |
|-------|--------------------------------------------------------------------------------------------|----|--------|
| KC05A | Fluid and Electrolyte Disorders 70 years and over with Major CC                            | 5  | 2,038  |
| KC05B | Fluid and Electrolyte Disorders 70 years and over with Intermediate CC                     | 3  | 1,178  |
| KC05D | Fluid and Electrolyte Disorders 69 years and under with Major CC                           | 6  | 1,836  |
| KC05E | Fluid and Electrolyte Disorders 69 years and under with Intermediate CC                    | 5  | 944    |
| LA02A | Kidney Transplant 19 years and over from Cadaver Heart beating donor                       | 18 | 19,456 |
| LA03A | Kidney Transplant 19 years and over from Live donor                                        | 7  | 20,798 |
| LA04E | Kidney or Urinary Tract Infections with length of stay 2 days or more with Intermediate CC | 4  | 2,092  |
| LA04F | Kidney or Urinary Tract Infections with length of stay 2 days or more without CC           | 2  | 1,518  |
| LA07D | Acute Kidney Injury with Major CC with Interventions                                       | 1  | 5,111  |
| LA07E | Acute Kidney Injury with Major CC without Interventions                                    | 4  | 2,234  |
| LA07F | Acute Kidney Injury with Intermediate CC with Interventions                                | 1  | 3,356  |
| LA07G | Acute Kidney Injury with Intermediate CC without Interventions                             | 5  | 1,475  |
| LA08A | Chronic Kidney Disease with length of stay 2 days or more with Major CC                    | 11 | 3,781  |
| LA08B | Chronic Kidney Disease with length of stay 2 days or more with Intermediate CC             | 19 | 2,673  |
| LA08C | Chronic Kidney Disease with length of stay 2 days or more without CC                       | 8  | 2,827  |
| LA09F | General Renal Disorders with length of stay 2 days or more with Intermediate CC            | 2  | 1,965  |
| LB01A | Percutaneous Nephrostomy with CC                                                           | 2  | 4,952  |
| LB02A | Kidney Major Open Procedure 19 years and over with Major CC                                | 1  | 8,178  |
| LB02C | Kidney Major Open Procedure 19 years and over without CC                                   | 2  | 5,100  |

|       |                                                                                                                     |     |       |
|-------|---------------------------------------------------------------------------------------------------------------------|-----|-------|
| LB05C | Kidney Intermediate, Endoscopic and Percutaneous Interventions 19 years and over without CC                         | 1   | 1,330 |
| LB06D | Kidney, Urinary Tract and Prostate Neoplasms with length of stay 2 days or more with Major CC                       | 1   | 3,786 |
| LB21Z | Bladder Neck Open Procedures - Male                                                                                 | 1   | 5,099 |
| LB25B | Prostate Transurethral Resection Procedure with Intermediate CC                                                     | 1   | 2,487 |
| LB53Z | Scrotum, Testis or Vas Deferens Intermediate Open Procedures                                                        | 1   | 1,875 |
| QZ01A | Aortic or Abdominal Surgery with CC                                                                                 | 34  | 8,494 |
| QZ02A | Lower Limb Arterial Surgery with CC                                                                                 | 65  | 8,088 |
| QZ04Z | Extracranial or Upper Limb Arterial Surgery                                                                         | 22  | 4,068 |
| QZ05A | Miscellaneous Vascular Procedures with CC                                                                           | 23  | 2,972 |
| QZ10A | Primary Unilateral Varicose Vein Procedures with CC (includes ulceration)                                           | 7   | 1,256 |
| QZ11B | Amputations without Major CC                                                                                        | 103 | 9,636 |
| QZ12Z | Foot Procedures for Diabetes or Arterial Disease, and Procedures to Amputation Stumps                               | 14  | 4,035 |
| QZ13A | Vascular Access for Renal Replacement Therapy with CC                                                               | 7   | 1,350 |
| QZ15B | Therapeutic Endovascular Procedures with Intermediate CC                                                            | 180 | 3,371 |
| QZ16B | Diagnostic Vascular Radiology and other transluminal diagnostic procedures with Intermediate CC                     | 14  | 2,525 |
| QZ16C | Diagnostic Vascular Radiology and other transluminal diagnostic procedures without CC                               | 38  | 1,612 |
| QZ17B | Non-Surgical Peripheral Vascular Disease with Intermediate CC                                                       | 105 | 2,009 |
| QZ20Z | Deep Vein Thrombosis                                                                                                | 69  | 985   |
| SA01D | Aplastic Anaemia with CC                                                                                            | 1   | 2,194 |
| SA13A | Single Plasma Exchange, Leucopheresis or Red Cell Exchange with length of stay 2 days or less and 19 years and over | 1   | 527   |
| SA31Z | Malignant Lymphoma (including Hodgkin's and non-Hodgkin's)                                                          | 2   | 1,939 |
| WA03V | Septicaemia with Major CC                                                                                           | 14  | 2,524 |

|       |                                                                       |    |       |
|-------|-----------------------------------------------------------------------|----|-------|
| WA05Q | Pyrexia of unknown origin with length of stay 5 days or more with CC  | 1  | 3,281 |
| WA09W | Other non-viral infection with CC                                     | 6  | 2,070 |
| WA11V | Poisoning, toxic, environmental and unspecified effects with Major CC | 1  | 1,271 |
| WA12V | Complications of Procedures with Major CC                             | 14 | 3,345 |
| WA17V | Other admissions related to neoplasms with Major CC                   | 3  | 2,695 |
| WA18V | Admission for unexplained symptoms with Major CC                      | 2  | 1,440 |
| WA21W | Other Procedures and health care problems with CC                     | 1  | 918   |

### B. Outpatient hospital episodes

| NAC_HRG | Description                                                                           | Number of episodes | Cost (£) per episode <sup>2</sup> |
|---------|---------------------------------------------------------------------------------------|--------------------|-----------------------------------|
| EA03Z   | Pace 1 - Single chamber or Implantable Diagnostic Device                              | 4                  | 143                               |
| EA27Z   | Percutaneous Standard EP or Ablation                                                  | 3                  | 247                               |
| EA36A   | Catheter 19 years and over                                                            | 1                  | 206                               |
| QZ10B   | Primary Unilateral Varicose Vein Procedures without CC                                | 4                  | 285                               |
| QZ16C   | Diagnostic Vascular Radiology and other transluminal diagnostic procedures without CC | 9                  | 238                               |

### C. Further outpatient hospital episodes, by specialty

| Specialty code     | Hospital specialty            | Number of episodes | Cost (£) per episode <sup>3</sup> |
|--------------------|-------------------------------|--------------------|-----------------------------------|
| 107                | Vascular Surgery              | 30                 | 133                               |
| 110T               | Trauma & Orthopaedics: Trauma | 1                  | 101                               |
| 300                | General Medicine              | 30                 | 153                               |
| 314                | Rehabilitation                | 1                  | 122                               |
| 320                | Cardiology                    | 133                | 134                               |
| 361                | Nephrology                    | 2                  | 164                               |
| 400                | Neurology                     | 3                  | 168                               |
| Total <sup>4</sup> |                               | 3,904              | 2,667 <sup>5</sup>                |



Note: Hospital episodes summarised in the table include at least one vascular event code recorded during the episode. These could be comorbidities or complications during a seemingly non-vascular HRG. Occasionally the vascular event code might not contribute directly to the mapping into HRG according the HRG grouper used.

HRG, Healthcare Resource Group; NAC\_HRG, Non-admitted consultations Healthcare Resource Group; CC, Comorbidity or complication

<sup>1</sup>Weighted unit costs for inpatient admissions (including elective and emergency admissions and day cases) from National Schedule of Reference Costs Year: 2010-11 - NHS Trusts HRG Data

<sup>2</sup>National Schedule of Reference Costs Year: 2010-11 - NHS Trusts Outpatient Procedures

<sup>3</sup>Cost for outpatient attendance by specialty was used: National Schedule of Reference Costs Year: 2010-11 - NHS Trusts Outpatient Attendances Data.

<sup>4</sup>21 admitted vascular hospital episodes were not grouped into case-mix groups and their costs were imputed using mean costs for similar category of episode.

<sup>5</sup>Calculated as average of all vascular hospital episodes
