# Supplementary material for: Cost-effectiveness of Simvastatin plus Ezetimibe for Cardiovascular Prevention in CKD: Results of the Study of Heart and Renal Protection (SHARP)
Source: PubMed Central journal article supplement (PMC4801501; doi:10.1053/j.ajkd.2015.09.020), 2016-04
Supplement: mmc6.pdf [file mmc6.pdf]

**Table S6: Net cost per major vascular event avoided with simvastatin plus ezetimibe in SHARP**

| Major vascular events avoided<br>(per 1000 treated for about 5<br>years)    | Net cost (£) per major vascular event avoided<br>(95% CI) <sup>1</sup> |
|-----------------------------------------------------------------------------|------------------------------------------------------------------------|
| <b>A. Use of ezetimibe/simvastatin to achieve observed effects in SHARP</b> |                                                                        |
| <b>5-year risk of cardiovascular disease at randomization</b>               |                                                                        |
| <10%                                                                        | 11                      135,620 (74,410 to 492,880)                    |
| 10% - 20%                                                                   | 27                      44,930 (24,440 to 167,870)                     |
| ≥20%                                                                        | 62                      14,180 (6,760 to 57,110)                       |
| <b>CKD stage at randomization</b>                                           |                                                                        |
| 3 <sup>2</sup>                                                              | 31                      43,270 (24,480 to 155,990)                     |
| 4                                                                           | 43                      29,120 (15,670 to 108,940)                     |
| 5, not on dialysis                                                          | 39                      26,010 (12,920 to 101,990)                     |
| On dialysis                                                                 | 38                      26,350 (13,070 to 104,980)                     |
| <b>All patients</b>                                                         | <b>40                      27,890 (14,770 to 106,560)</b>              |
| <b>B. With full adherence to ezetimibe/simvastatin</b>                      |                                                                        |
| <b>5-year risk of cardiovascular disease at randomization</b>               |                                                                        |
| <10%                                                                        | 16                      120,800 (67,570 to 425,610)                    |
| 10% - 20%                                                                   | 42                      39,320 (22,060 to 141,750)                     |
| ≥20%                                                                        | 102                      11,140 (5230 to 44,560)                       |
| <b>CKD stage at randomization</b>                                           |                                                                        |
| 3 <sup>2</sup>                                                              | 44                      38,450 (22,380 to 134,710)                     |
| 4                                                                           | 61                      26,210 (14,450 to 95,570)                      |
| 5, not on dialysis                                                          | 66                      21,040 (10,620 to 80,670)                      |
| On dialysis                                                                 | 67                      20,350 (10,130 to 79,790)                      |
| <b>All patients</b>                                                         | <b>63                      23,840 (12,930 to 88,960)</b>               |

CI, confidence interval; Ezetimibe/simvastatin at £1.19/day (UK, 2014); <sup>1</sup>with costs and events discounted at 3.5% per annum; <sup>2</sup>83% of participants in this category with chronic kidney disease stage 3b (eGFR ≥30 to <45 ml/min/1.73m<sup>2</sup>).
