# Supplementary material for: Cost-effectiveness of Simvastatin plus Ezetimibe for Cardiovascular Prevention in CKD: Results of the Study of Heart and Renal Protection (SHARP)
Source: PubMed Central journal article supplement (PMC4801501; doi:10.1053/j.ajkd.2015.09.020), 2016-04
Supplement: mmc8.pdf [file mmc8.pdf]

**Table S8: Projected gains in quality of life-adjusted survival and net cost per quality-adjusted life year with 5 years of simvastatin plus ezetimibe treatment in SHARP**

|                                                               | <b>Life years gained</b> | <b>Quality-adjusted life years gained</b> | <b>Additions cost (£) of treating end-stage renal disease</b> | <b>Net cost (£) per quality-adjusted life-year gained</b> |
|---------------------------------------------------------------|--------------------------|-------------------------------------------|---------------------------------------------------------------|-----------------------------------------------------------|
| <b>Simvastatin 20mg plus ezetimibe 10mg daily</b>             |                          |                                           |                                                               |                                                           |
| <b>5-year risk of cardiovascular disease at randomization</b> |                          |                                           |                                                               |                                                           |
| <10%                                                          | 0.09                     | 0.06                                      | 1,090                                                         | 39,600                                                    |
| 10% - 20%                                                     | 0.11                     | 0.08                                      | 1,400                                                         | 30,500                                                    |
| ≥20%                                                          | 0.07                     | 0.05                                      | 810                                                           | 33,300                                                    |
| <b>CKD stage at randomization</b>                             |                          |                                           |                                                               |                                                           |
| 3 <sup>1</sup>                                                | 0.15                     | 0.13                                      | 440                                                           | 13,000                                                    |
| 4                                                             | 0.15                     | 0.11                                      | 1,370                                                         | 22,400                                                    |
| 5, not on dialysis                                            | 0.06                     | 0.04                                      | 840                                                           | 43,300                                                    |
| On dialysis                                                   | 0.07                     | 0.05                                      | 1,100                                                         | 42,700                                                    |

All outcomes and costs discounted at 3.5% per annum; <sup>1</sup>83% of participants in this category with chronic kidney disease (CKD) stage 3b (eGFR ≥30 to <45 ml/min/1.73m<sup>2</sup>)
