# Supplementary material for: Cost-effectiveness of Simvastatin plus Ezetimibe for Cardiovascular Prevention in CKD: Results of the Study of Heart and Renal Protection (SHARP)
Source: PubMed Central journal article supplement (PMC4801501; doi:10.1053/j.ajkd.2015.09.020), 2016-04
Supplement: mmc10.pdf [file mmc10.pdf]

**Figure S2: Effect of allocation to simvastatin plus ezetimibe on all major vascular events in SHARP**

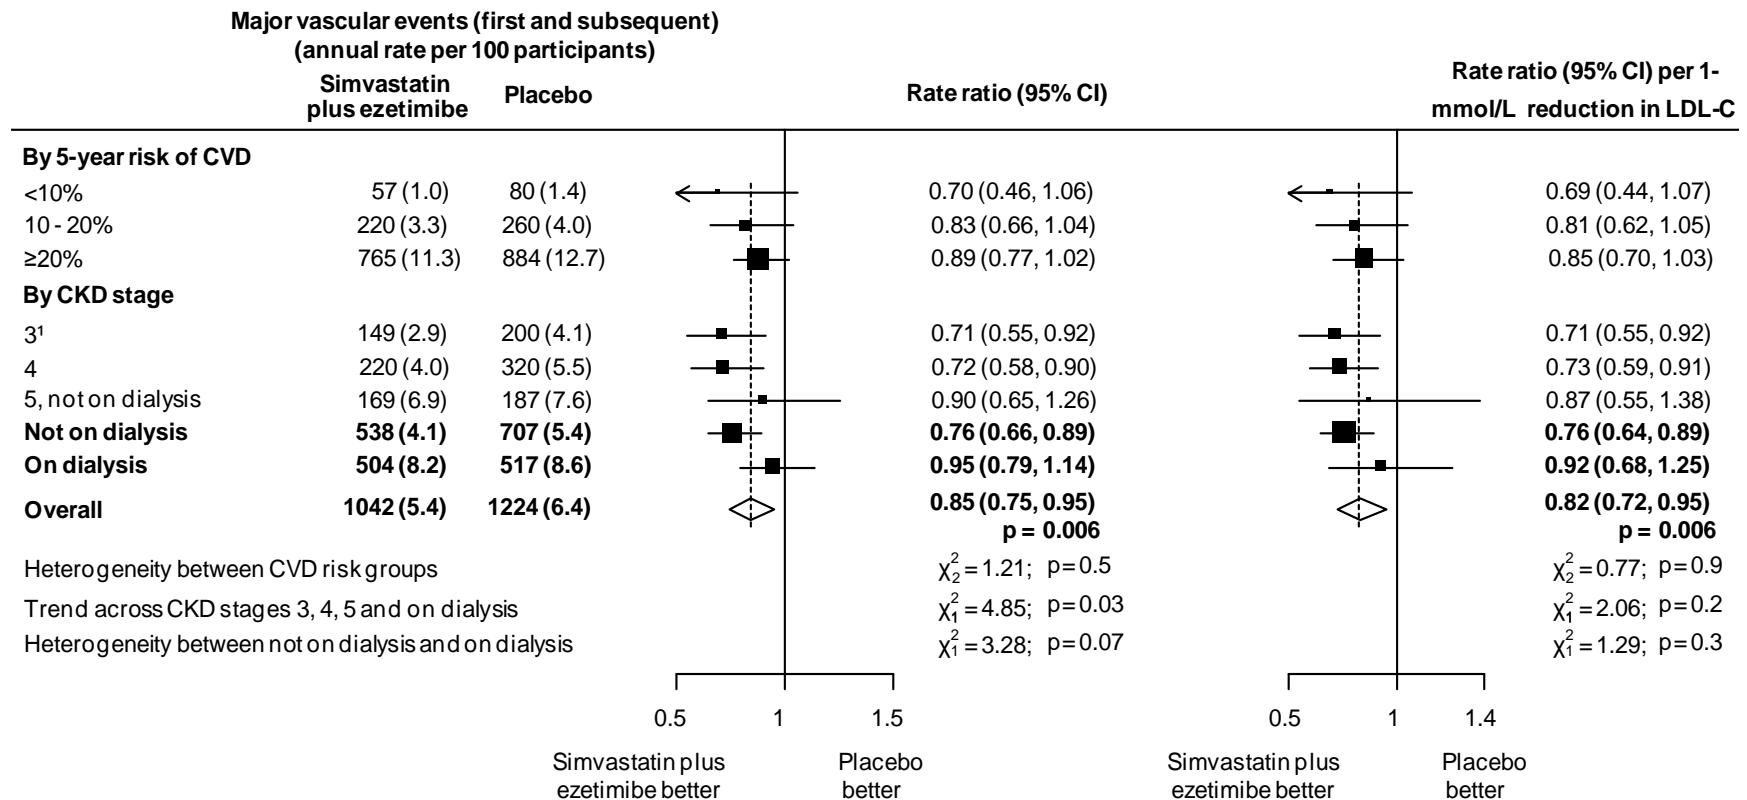

CI, confidence interval; CVD, cardiovascular disease; CKD, chronic kidney disease; LDL-C, LDL cholesterol.

<sup>†</sup>83% of participants in this category with chronic kidney disease (CKD) stage 3b (eGFR ≥30 to <45 ml/min/1.73m<sup>2</sup>)
